# Supplementary material for: Genetic Risk Score Associations With Cardiovascular Disease and Mortality in the Diabetes Heart Study
Source: PubMed Central journal article supplement — Diabetes Care. 2014 Mar 8;37(4):1157–64. doi: 10.2337/dc13-1514 (PMC4178326; doi:10.2337/dc13-1514), 2014-03-08
Supplement: supp_dc13-1514v131514_DC131514SupplementaryData.pdf [file supp_dc13-1514v131514_DC131514SupplementaryData.pdf]

SUPPLEMENTARY DATA

**Supplementary Table 1A.** The SNPs included in the 13SNP(\*) and 30SNP GRS including the source of data, minor allele frequency (MAF) and Hardy Weinberg Equilibrium p-value (HWE). Previously reported association p-values and published effects (as odds ratios (OR)) used for weighting are also shown. Single SNP association effect sizes and p-values in the Diabetes Heart Study (DHS) for associations with self-reported history of prior CVD (effect reported as OR) and coronary artery calcified plaque (CAC; effect reported as  $\beta$  value) are shown. Associations are reported for the risk allele as used in the GRS. †effect allele in bold.

| Chr | Position  | SNP         | Gene         | DHS Data |                        |       |      | Reported Assoc. |                        | DHS Single SNP association Results |         |                    |         | Reference |
|-----|-----------|-------------|--------------|----------|------------------------|-------|------|-----------------|------------------------|------------------------------------|---------|--------------------|---------|-----------|
|     |           |             |              | Source   | Alleles (Maj/Min)<br>† | MAF   | HWE  | Effect          | p-value                | Prior CVD                          |         | CAC                |         |           |
|     |           |             |              |          |                        |       |      |                 |                        | Effect (OR)                        | p-value | Effect ( $\beta$ ) | p-value |           |
| 1   | 55496039  | rs11206510* | PCSK9        | Exome    | <b>A/G</b>             | 0.211 | 1.00 | 1.15            | 9.60x10 <sup>-9</sup>  | 1.02                               | 0.76    | 0.15               | 0.22    | [4]       |
| 1   | 109818530 | rs646776*   | CELSR2       | Exome    | <b>A/G</b>             | 0.230 | 0.80 | 1.19            | 7.90x10 <sup>-12</sup> | 1.06                               | 0.40    | 0.24               | 0.04    | [4]       |
| 1   | 222823529 | rs17465637* | MIA3         | GWAS     | <b>C/A</b>             | 0.276 | 0.82 | 1.20            | 1.27x10 <sup>-6</sup>  | 1.03                               | 0.58    | 0.12               | 0.25    | [5]       |
| 1   | 109822166 | rs599839    | SORT1        | Exome    | <b>A/G</b>             | 0.236 | 0.53 | 1.29            | 4.05x10 <sup>-9</sup>  | 1.06                               | 0.43    | 0.27               | 0.02    | [5]       |
| 2   | 203745885 | rs6725887*  | WDR12        | GWAS     | <b>T/C</b>             | 0.137 | 0.43 | 1.16            | 1.30x10 <sup>-8</sup>  | 1.02                               | 0.83    | 0.16               | 0.26    | [4]       |
| 2   | 227068080 | rs2943634   | IRS1         | GWAS     | <b>C/A</b>             | 0.312 | 0.67 | 1.22            | 1.19x10 <sup>-5</sup>  | 1.12                               | 0.06    | 0.06               | 0.55    | [5]       |
| 3   | 138119952 | rs2306374   | MRAS         | GWAS     | <b>T/C</b>             | 0.164 | 0.61 | 1.15            | 3.34x10 <sup>-8</sup>  | 1.01                               | 0.85    | 0.14               | 0.29    | [6]       |
| 3   | 138122122 | rs9818870*  | MRAS         | GWAS     | <b>C/T</b>             | 0.165 | 0.73 | 1.15            | 7.44x10 <sup>-13</sup> | 1.00                               | 0.98    | 0.10               | 0.46    | [2]       |
| 6   | 12927544  | rs12526453* | PHACTR1      | GWAS     | <b>C/G</b>             | 0.346 | 1.00 | 1.13            | 1.30x10 <sup>-9</sup>  | 1.06                               | 0.31    | 0.05               | 0.66    | [4]       |
| 6   | 35034800  | rs17609940  | ANKS1A       | GWAS     | <b>G/C</b>             | 0.200 | 1.00 | 1.07            | 1.36x10 <sup>-8</sup>  | 1.00                               | 0.94    | 0.15               | 0.21    | [6]       |
| 6   | 151252985 | rs6922269   | MTHFD1L      | GWAS     | <b>G/A</b>             | 0.285 | 0.03 | 1.23            | 6.33x10 <sup>-6</sup>  | 1.00                               | 0.96    | 0.20               | 0.08    | [5]       |
| 6   | 160961137 | rs3798220*  | LPA          | Exome    | <b>A/G</b>             | 0.016 | 1.00 | 1.92            | 9.0x10 <sup>-7</sup>   | 1.33                               | 0.20    | 0.59               | 0.13    | [1]       |
| 7   | 129663496 | rs11556924  | ZC3HC1       | GWAS     | <b>C/T</b>             | 0.388 | 0.33 | 1.09            | 9.18x10 <sup>-18</sup> | 1.05                               | 0.41    | 0.14               | 0.17    | [6]       |
| 9   | 22098574  | rs4977574*  | CDKN2B-AS1   | GWAS     | <b>A/G</b>             | 0.472 | 0.35 | 1.29            | 2.7x10 <sup>-44</sup>  | 1.10                               | 0.09    | 0.12               | 0.22    | [4]       |
| 9   | 136154168 | rs579459    | ABO          | Exome    | <b>A/G</b>             | 0.212 | 0.28 | 1.10            | 4.08x10 <sup>-14</sup> | 1.05                               | 0.48    | 0.13               | 0.31    | [6]       |
| 10  | 44753867  | rs501120    | LOC100130539 | Exome    | <b>A/G</b>             | 0.124 | 0.49 | 1.24            | 1.31x10 <sup>-3</sup>  | 1.02                               | 0.82    | 0.15               | 0.30    | [5]       |
| 10  | 44775824  | rs1746048*  | CXCL12       | GWAS     | <b>C/T</b>             | 0.123 | 0.66 | 1.33            | 5.73x10 <sup>-7</sup>  | 1.02                               | 0.83    | 0.14               | 0.35    | [6]       |
| 10  | 104719096 | rs12413409  | CNNM2        | GWAS     | <b>G/A</b>             | 0.084 | 0.77 | 1.12            | 1.03x10 <sup>-9</sup>  | 1.04                               | 0.67    | 0.12               | 0.49    | [6]       |
| 11  | 116648917 | rs964184    | ZNF259       | Exome    | <b>C/G</b>             | 0.153 | 0.73 | 1.13            | 1.02x10 <sup>-17</sup> | 1.03                               | 0.67    | 0.06               | 0.68    | [6]       |
| 12  | 111884608 | rs3184504*  | SH2B3        | Exome    | <b>G/A</b>             | 0.497 | 0.35 | 1.13            | 8.6x10 <sup>-8</sup>   | 1.08                               | 0.14    | 0.14               | 0.15    | [3]       |
| 12  | 121435587 | rs2259816*  | HNF1A        | GWAS     | <b>G/T</b>             | 0.344 | 0.26 | 1.08            | 4.81x10 <sup>-7</sup>  | 1.03                               | 0.62    | 0.04               | 0.67    | [2]       |
| 13  | 110960712 | rs4773144   | COL4A1       | Exome    | <b>A/G</b>             | 0.417 | 0.44 | 1.07            | 3.84x10 <sup>-9</sup>  | 1.13                               | 0.03    | 0.04               | 0.70    | [6]       |
| 14  | 100133942 | rs2895811   | HHIPL1       | Exome    | <b>A/G</b>             | 0.415 | 0.51 | 1.07            | 1.14x10 <sup>-7</sup>  | 1.02                               | 0.69    | 0.16               | 0.11    | [6]       |
| 15  | 67458639  | rs17228212  | SMAD3        | GWAS     | <b>T/C</b>             | 0.306 | 0.16 | 1.19            | 1.18x10 <sup>-4</sup>  | 1.08                               | 0.19    | 0.13               | 0.24    | [5]       |
| 15  | 79089111  | rs3825807   | ADAMTS7      | Exome    | <b>A/G</b>             | 0.464 | 0.26 | 1.08            | 1.07x10 <sup>-12</sup> | 1.06                               | 0.26    | 0.18               | 0.06    | [6]       |
| 17  | 2126504   | rs216172    | SMG6         | Exome    | <b>G/C</b>             | 0.366 | 0.77 | 1.07            | 1.15x10 <sup>-9</sup>  | 1.09                               | 0.13    | 0.03               | 0.72    | [6]       |
| 17  | 17543722  | rs12936587  | PEMT         | Exome    | <b>G/A</b>             | 0.441 | 0.93 | 1.07            | 4.45x10 <sup>-10</sup> | 1.04                               | 0.48    | 0.14               | 0.16    | [6]       |
| 17  | 46988597  | rs46522     | UBE2Z        | Exome    | <b>A/G</b>             | 0.460 | 0.35 | 1.06            | 1.81x10 <sup>-8</sup>  | 1.05                               | 0.39    | 0.08               | 0.41    | [6]       |
| 19  | 11163601  | rs1122608*  | SMARCA4      | Exome    | <b>C/A</b>             | 0.256 | 0.90 | 1.14            | 1.90x10 <sup>-9</sup>  | 1.04                               | 0.52    | 0.13               | 0.22    | [4]       |
| 21  | 35599128  | rs9982601*  | MRPS6        | Imputed  | <b>C/T</b>             | 0.122 | 0.92 | 1.20            | 6.4x10 <sup>-11</sup>  | 1.07                               | 0.44    | 0.11               | 0.49    | [4]       |

SUPPLEMENTARY DATA

**Supplementary Table 1B.** The SNPs included in the 13SNP(\*) and 30SNP GRS including the source of data, minor allele frequency (MAF) and Hardy Weinberg Equilibrium p-value (HWE). Previously reported association p-values and published effects (as odds ratios (OR)) used for weighting are also shown. Single SNP association effect sizes and p-values in the Diabetes Heart Study (DHS) for associations with all-cause mortality and CVD-mortality are shown. Associations are reported for the risk allele as used in the GRS. †effect allele in bold.

| Chr | Position  | SNP         | Gene         | DHS Data |                        |       |      | Reported Assoc. |                        | DHS Single SNP association Results |         |               |         | Reference |
|-----|-----------|-------------|--------------|----------|------------------------|-------|------|-----------------|------------------------|------------------------------------|---------|---------------|---------|-----------|
|     |           |             |              | Source   | Alleles (Maj/Min)<br>† | MAF   | HWE  | Effect          | p-value                | All-cause mortality                |         | CVD mortality |         |           |
|     |           |             |              |          |                        |       |      |                 |                        | Effect                             | p-value | Effect        | p-value |           |
| 1   | 55496039  | rs11206510* | PCSK9        | Exome    | <b>A/G</b>             | 0.211 | 1.00 | 1.15            | 9.60x10 <sup>-9</sup>  | 1.02                               | 0.80    | 1.10          | 0.32    | [4]       |
| 1   | 109818530 | rs646776*   | CELSR2       | Exome    | <b>A/G</b>             | 0.230 | 0.80 | 1.19            | 7.90x10 <sup>-12</sup> | 1.05                               | 0.55    | 1.16          | 0.11    | [4]       |
| 1   | 222823529 | rs17465637* | MIA3         | GWAS     | <b>C/A</b>             | 0.276 | 0.82 | 1.20            | 1.27x10 <sup>-6</sup>  | 1.08                               | 0.27    | 1.09          | 0.11    | [5]       |
| 1   | 109822166 | rs599839    | SORT1        | Exome    | <b>A/G</b>             | 0.236 | 0.53 | 1.29            | 4.05x10 <sup>-9</sup>  | 1.04                               | 0.64    | 1.13          | 0.17    | [5]       |
| 2   | 203745885 | rs6725887*  | WDR12        | GWAS     | <b>T/C</b>             | 0.137 | 0.43 | 1.16            | 1.30x10 <sup>-8</sup>  | 1.13                               | 0.18    | 1.07          | 0.54    | [4]       |
| 2   | 227068080 | rs2943634   | IRS1         | GWAS     | <b>C/A</b>             | 0.312 | 0.67 | 1.22            | 1.19x10 <sup>-5</sup>  | 1.03                               | 0.61    | 1.09          | 0.29    | [5]       |
| 3   | 138119952 | rs2306374   | MRAS         | GWAS     | <b>T/C</b>             | 0.164 | 0.61 | 1.15            | 3.34x10 <sup>-8</sup>  | 1.03                               | 0.77    | 1.12          | 0.29    | [6]       |
| 3   | 138122122 | rs9818870*  | MRAS         | GWAS     | <b>C/T</b>             | 0.165 | 0.73 | 1.15            | 7.44x10 <sup>-13</sup> | 1.01                               | 0.87    | 1.12          | 0.31    | [2]       |
| 6   | 12927544  | rs12526453* | PHACTR1      | GWAS     | <b>C/G</b>             | 0.346 | 1.00 | 1.13            | 1.30x10 <sup>-9</sup>  | 1.03                               | 0.67    | 1.12          | 0.16    | [4]       |
| 6   | 35034800  | rs17609940  | ANKS1A       | GWAS     | <b>G/C</b>             | 0.200 | 1.00 | 1.07            | 1.36x10 <sup>-8</sup>  | 1.05                               | 0.54    | 1.10          | 0.32    | [6]       |
| 6   | 151252985 | rs6922269   | MTHFD1L      | GWAS     | <b>G/A</b>             | 0.285 | 0.03 | 1.23            | 6.33x10 <sup>-6</sup>  | 1.05                               | 0.52    | 1.05          | 0.59    | [5]       |
| 6   | 160961137 | rs3798220*  | LPA          | Exome    | <b>A/G</b>             | 0.016 | 1.00 | 1.92            | 9.0x10 <sup>-7</sup>   | 1.17                               | 0.50    | 1.07          | 0.82    | [1]       |
| 7   | 129663496 | rs11556924  | ZC3HC1       | GWAS     | <b>C/T</b>             | 0.388 | 0.33 | 1.09            | 9.18x10 <sup>-18</sup> | 1.04                               | 0.56    | 1.01          | 0.92    | [6]       |
| 9   | 22098574  | rs4977574*  | CDKN2B-AS1   | GWAS     | <b>A/G</b>             | 0.472 | 0.35 | 1.29            | 2.7x10 <sup>-44</sup>  | 1.08                               | 0.23    | 1.13          | 0.13    | [4]       |
| 9   | 136154168 | rs579459    | ABO          | Exome    | <b>A/G</b>             | 0.212 | 0.28 | 1.10            | 4.08x10 <sup>-14</sup> | 1.08                               | 0.35    | 1.06          | 0.52    | [6]       |
| 10  | 44753867  | rs501120    | LOC100130539 | Exome    | <b>A/G</b>             | 0.124 | 0.49 | 1.24            | 1.31x10 <sup>-3</sup>  | 1.32                               | 0.006   | 1.23          | 0.09    | [5]       |
| 10  | 44775824  | rs1746048*  | CXCL12       | GWAS     | <b>C/T</b>             | 0.123 | 0.66 | 1.33            | 5.73x10 <sup>-7</sup>  | 1.31                               | 0.007   | 1.23          | 0.10    | [6]       |
| 10  | 104719096 | rs12413409  | CNNM2        | GWAS     | <b>G/A</b>             | 0.084 | 0.77 | 1.12            | 1.03x10 <sup>-9</sup>  | 1.23                               | 0.08    | 1.30          | 0.09    | [6]       |
| 11  | 116648917 | rs964184    | ZNF259       | Exome    | <b>C/G</b>             | 0.153 | 0.73 | 1.13            | 1.02x10 <sup>-17</sup> | 1.00                               | 0.95    | 1.07          | 0.50    | [6]       |
| 12  | 111884608 | rs3184504*  | SH2B3        | Exome    | <b>G/A</b>             | 0.497 | 0.35 | 1.13            | 8.6x10 <sup>-8</sup>   | 1.07                               | 0.27    | 1.03          | 0.70    | [3]       |
| 12  | 121435587 | rs2259816*  | HNF1A        | GWAS     | <b>G/T</b>             | 0.344 | 0.26 | 1.08            | 4.81x10 <sup>-7</sup>  | 1.01                               | 0.90    | 1.03          | 0.68    | [2]       |
| 13  | 110960712 | rs4773144   | COL4A1       | Exome    | <b>A/G</b>             | 0.417 | 0.44 | 1.07            | 3.84x10 <sup>-9</sup>  | 1.15                               | 0.03    | 1.19          | 0.02    | [6]       |
| 14  | 100133942 | rs2895811   | HHIPL1       | Exome    | <b>A/G</b>             | 0.415 | 0.51 | 1.07            | 1.14x10 <sup>-7</sup>  | 1.06                               | 0.33    | 1.03          | 0.72    | [6]       |
| 15  | 67458639  | rs17228212  | SMAD3        | GWAS     | <b>T/C</b>             | 0.306 | 0.16 | 1.19            | 1.18x10 <sup>-4</sup>  | 1.04                               | 0.54    | 1.18          | 0.04    | [5]       |
| 15  | 79089111  | rs3825807   | ADAMTS7      | Exome    | <b>A/G</b>             | 0.464 | 0.26 | 1.08            | 1.07x10 <sup>-12</sup> | 1.03                               | 0.59    | 1.04          | 0.62    | [6]       |
| 17  | 2126504   | rs216172    | SMG6         | Exome    | <b>G/C</b>             | 0.366 | 0.77 | 1.07            | 1.15x10 <sup>-9</sup>  | 1.00                               | 0.99    | 1.07          | 0.37    | [6]       |
| 17  | 17543722  | rs12936587  | PMT          | Exome    | <b>G/A</b>             | 0.441 | 0.93 | 1.07            | 4.45x10 <sup>-10</sup> | 1.05                               | 0.41    | 1.04          | 0.62    | [6]       |
| 17  | 46988597  | rs46522     | UBE2Z        | Exome    | <b>A/G</b>             | 0.460 | 0.35 | 1.06            | 1.81x10 <sup>-8</sup>  | 1.04                               | 0.55    | 1.04          | 0.63    | [6]       |
| 19  | 11163601  | rs1122608*  | SMARCA4      | Exome    | <b>C/A</b>             | 0.256 | 0.90 | 1.14            | 1.90x10 <sup>-9</sup>  | 1.11                               | 0.15    | 1.03          | 0.72    | [4]       |
| 21  | 35599128  | rs9982601*  | MRPS6        | Imputed  | <b>C/T</b>             | 0.122 | 0.92 | 1.20            | 6.4x10 <sup>-11</sup>  | 1.02                               | 0.80    | 1.01          | 0.96    | [4]       |

SUPPLEMENTARY DATA

**Supplementary Table 2.** Association of 13 SNP and 30 SNP genetic risk scores with history of prior CVD, all-cause mortality, CVD-mortality and CAC in European Americans (n=1175) from the Diabetes Heart Study. Effect estimates are reported as odds ratios (OR), hazard ratios (HR) and  $\beta$ -coefficient ( $\beta$ ) based on a single unit increase in the GRS i.e. per risk allele.

| Trait                        | Unadjusted                  |         | Partially Adjusted*         |         | Fully Adjusted†             |         |
|------------------------------|-----------------------------|---------|-----------------------------|---------|-----------------------------|---------|
|                              | Effect (95% CI)             | p-value | Effect (95% CI)             | p-value | Effect (95% CI)             | p-value |
| <b>13 SNP Unweighted GRS</b> |                             |         |                             |         |                             |         |
| Prior CVD                    | OR: 1.06 (1.00-1.13)        | 0.05    | OR: 1.08 (1.01-1.14)        | 0.02    | OR: 1.09 (1.03-1.16)        | 0.006   |
| All-cause Mortality          | HR: 0.99 (0.93-1.06)        | 0.80    | HR: 1.02 (0.96-1.09)        | 0.47    | HR: 1.02 (0.96-1.09)        | 0.46    |
| CVD Mortality                | HR: 1.06 (0.98-1.15)        | 0.18    | HR: 1.08 (1.00-1.18)        | 0.06    | HR: 1.09 (1.00-1.19)        | 0.05    |
| CAC                          | $\beta$ : 0.02 (-0.06-0.11) | 0.60    | $\beta$ : 0.03 (-0.03-0.10) | 0.34    | $\beta$ : 0.04 (-0.02-0.11) | 0.22    |
| <b>13 SNP Weighted GRS</b>   |                             |         |                             |         |                             |         |
| Prior CVD                    | OR: 1.08 (1.01-1.16)        | 0.02    | OR: 1.10 (1.03-1.18)        | 0.007   | OR: 1.11 (1.04-1.20)        | 0.003   |
| All-cause Mortality          | HR: 1.01 (0.94-1.09)        | 0.78    | HR: 1.04 (0.97-1.12)        | 0.26    | HR: 1.04 (0.97-1.12)        | 0.24    |
| CVD Mortality                | HR: 1.07 (0.97-1.17)        | 0.18    | HR: 1.09 (0.99-1.20)        | 0.07    | HR: 1.10 (1.00-1.21)        | 0.06    |
| CAC                          | $\beta$ : 0.05 (-0.05-0.15) | 0.33    | $\beta$ : 0.06 (-0.02-0.13) | 0.14    | $\beta$ : 0.07 (-0.01-0.14) | 0.08    |
| <b>30 SNP Unweighted GRS</b> |                             |         |                             |         |                             |         |
| Prior CVD                    | OR: 1.03 (1.00-1.07)        | 0.07    | OR: 1.04 (1.00-1.08)        | 0.04    | OR: 1.04 (1.00-1.09)        | 0.02    |
| All-cause Mortality          | HR: 1.02 (0.99-1.06)        | 0.24    | HR: 1.03 (0.99-1.06)        | 0.11    | HR: 1.03 (0.99-1.06)        | 0.11    |
| CVD Mortality                | HR: 1.06 (1.01-1.12)        | 0.03    | HR: 1.06 (1.01-1.12)        | 0.02    | HR: 1.07 (1.02-1.13)        | 0.01    |
| CAC                          | $\beta$ : 0.05 (0.01-0.10)  | 0.02    | $\beta$ : 0.06 (0.02-0.09)  | 0.005   | $\beta$ : 0.06 (0.02-0.10)  | 0.002   |
| <b>30 SNP Weighted GRS</b>   |                             |         |                             |         |                             |         |
| Prior CVD                    | OR: 1.03 (1.00-1.07)        | 0.07    | OR: 1.04 (1.00-1.08)        | 0.04    | OR: 1.04 (1.01-1.09)        | 0.02    |
| All-cause Mortality          | HR: 1.03 (0.99-1.07)        | 0.14    | HR: 1.04 (1.00-1.08)        | 0.04    | HR: 1.04 (1.00-1.08)        | 0.03    |
| CVD Mortality                | HR: 1.05 (1.00-1.10)        | 0.06    | HR: 1.06 (1.00-1.11)        | 0.03    | HR: 1.06 (1.01-1.11)        | 0.02    |
| CAC                          | $\beta$ : 0.05 (0.00-0.09)  | 0.06    | $\beta$ : 0.05 (0.01-0.09)  | 0.02    | $\beta$ : 0.05 (0.01-0.09)  | 0.007   |

\*adjusted for age, sex, type 2 diabetes affection status; †adjusted for age, sex, type 2 diabetes affection status, BMI, current smoking, hypertension, dyslipidemia

SUPPLEMENTARY DATA

**Supplementary Table 3.** Association between unweighted 13SNP low (n=339), moderate (mod; n=618) and high (n=218) genetic risk score groups and history of prior CVD, all-cause mortality, CVD mortality and CAC in European Americans from the Diabetes Heart Study. Effect estimates (odds ratio (OR); hazard ratio (HR);  $\beta$ -coefficient ( $\beta$ )) are reported relative to the low risk group.

|                            |                        | Unadjusted                   |         | Partially Adjusted*         |         | Fully Adjusted†             |         |
|----------------------------|------------------------|------------------------------|---------|-----------------------------|---------|-----------------------------|---------|
|                            | n (%) or mean $\pm$ SD | Effect (95% CI)              | p-value | Effect (95% CI)             | p-value | Effect (95% CI)             | p-value |
| <b>Prior CVD</b>           |                        |                              |         |                             |         |                             |         |
| low                        | 117 (34.5%)            | 1.00 (ref)                   | -       | 1.00 (ref)                  | -       | 1.00 (ref)                  | -       |
| mod                        | 247 (40.0%)            | OR: 1.30 (0.99-1.71)         | 0.06    | OR: 1.39 (1.03-1.86)        | 0.03    | OR: 1.43 (1.06-1.94)        | 0.02    |
| high                       | 95 (43.6%)             | OR: 1.51 (1.05-2.15)         | 0.02    | OR: 1.67 (1.15-2.42)        | 0.007   | OR: 1.77 (1.21-2.59)        | 0.003   |
| <b>All-cause Mortality</b> |                        |                              |         |                             |         |                             |         |
| low                        | 75 (22.1%)             | 1.00 (ref)                   | -       | 1.00 (ref)                  | -       | 1.00 (ref)                  | -       |
| mod                        | 126 (20.4%)            | HR: 0.95 (0.71-1.27)         | 0.71    | HR: 1.05 (0.79-1.38)        | 0.75    | HR: 1.07 (0.81-1.40)        | 0.64    |
| high                       | 45 (20.6%)             | HR: 0.93 (0.63-1.36)         | 0.70    | HR: 1.11 (0.77-1.60)        | 0.58    | HR: 1.17 (0.77-1.62)        | 0.56    |
| <b>CVD Mortality</b>       |                        |                              |         |                             |         |                             |         |
| low                        | 28 (8.3%)              | 1.00 (ref)                   | -       | 1.00 (ref)                  | -       | 1.00 (ref)                  | -       |
| mod                        | 59 (9.5%)              | HR: 1.18 (0.73-1.90)         | 0.50    | HR: 1.28 (0.80-2.07)        | 0.30    | HR: 1.31 (0.81-2.11)        | 0.27    |
| high                       | 20 (9.2%)              | HR: 1.10 (0.61-1.97)         | 0.75    | HR: 1.26 (0.70-2.26)        | 0.44    | HR: 1.30 (0.72-2.32)        | 0.38    |
| <b>CAC</b>                 |                        |                              |         |                             |         |                             |         |
| low                        | 1598 $\pm$ 2821        | 1.00 (ref)                   | -       | 1.00 (ref)                  | -       | 1.00 (ref)                  | -       |
| mod                        | 1731 $\pm$ 2952        | $\beta$ : 0.14 (-0.22-0.50)  | 0.44    | $\beta$ : 0.15 (-0.14-0.45) | 0.31    | $\beta$ : 0.17 (-0.12-0.45) | 0.25    |
| high                       | 1462 $\pm$ 2528        | $\beta$ : 0.004 (-0.49-0.50) | 0.99    | $\beta$ : 0.08 (-0.32-0.49) | 0.70    | $\beta$ : 0.11 (-0.28-0.51) | 0.58    |

\*adjusted for age, sex; †adjusted for age, sex, BMI, current smoking, hypertension, dyslipidemia

SUPPLEMENTARY DATA

**Supplementary Table 4.** Association between unweighted 30SNP low (n=193), moderate (mod; n=707) and high (n=275) genetic risk score groups and history of prior CVD, all-cause mortality, CVD mortality and CAC in European Americans from the Diabetes Heart Study. Effect estimates (odds ratio (OR); hazard ratio (HR);  $\beta$ -coefficient ( $\beta$ )) are reported relative to the low risk group.

|                            |                        | Unadjusted                  |         | Partially Adjusted*        |                       | Fully Adjusted†            |                       |
|----------------------------|------------------------|-----------------------------|---------|----------------------------|-----------------------|----------------------------|-----------------------|
|                            | n (%) or mean $\pm$ SD | Effect (95% CI)             | p-value | Effect (95% CI)            | p-value               | Effect (95% CI)            | p-value               |
| <b>Prior CVD</b>           |                        |                             |         |                            |                       |                            |                       |
| low                        | 60 (31.1%)             | 1.00 (ref)                  | -       | 1.00 (ref)                 | -                     | 1.00 (ref)                 | -                     |
| mod                        | 326 (39.6%)            | OR: 1.49 (1.05-2.11)        | 0.02    | OR: 1.60 (1.12-2.28)       | 0.009                 | OR: 1.66 (1.15-2.38)       | 0.006                 |
| high                       | 73 (45.9%)             | OR: 1.91 (1.19-3.05)        | 0.007   | OR: 1.99 (1.24-3.18)       | 0.004                 | OR: 2.10 (1.29-3.40)       | 0.003                 |
| <b>All-cause Mortality</b> |                        |                             |         |                            |                       |                            |                       |
| low                        | 28 (14.5%)             | 1.00 (ref)                  | -       | 1.00 (ref)                 | -                     | 1.00 (ref)                 | -                     |
| mod                        | 179 (21.7%)            | HR: 1.59 (1.06-2.36)        | 0.02    | HR: 1.70 (1.17-2.45)       | 0.005                 | HR: 1.70 (1.18-2.45)       | 0.005                 |
| high                       | 39 (24.5%)             | HR: 1.71 (1.02-2.86)        | 0.04    | HR: 1.82 (1.21-2.95)       | 0.02                  | HR: 1.75 (1.08-2.86)       | 0.02                  |
| <b>CVD-Mortality</b>       |                        |                             |         |                            |                       |                            |                       |
| low                        | 10 (5.2%)              | 1.00 (ref)                  | -       | 1.00 (ref)                 | -                     | 1.00 (ref)                 | -                     |
| mod                        | 76 (9.2%)              | HR: 1.88 (0.91-3.87)        | 0.08    | HR: 2.00 (0.98-4.07)       | 0.06                  | HR: 2.06 (1.01-4.19)       | 0.05                  |
| high                       | 21 (13.2%)             | HR: 2.56 (1.14-5.76)        | 0.02    | HR: 2.67 (1.20-5.92)       | 0.02                  | HR: 2.76 (1.23-6.21)       | 0.01                  |
| <b>CAC</b>                 |                        |                             |         |                            |                       |                            |                       |
| low                        | 1362 $\pm$ 2696        | 1.00 (ref)                  | -       | 1.00 (ref)                 | -                     | 1.00 (ref)                 | -                     |
| mod                        | 1655 $\pm$ 2821        | $\beta$ : 0.37 (-0.06-0.80) | 0.09    | $\beta$ : 0.46 (0.12-0.80) | 0.009                 | $\beta$ : 0.45 (0.12-0.79) | 0.008                 |
| high                       | 1911 $\pm$ 3074        | $\beta$ : 0.96 (0.41-1.50)  | 0.0006  | $\beta$ : 0.91 (0.46-1.35) | 6.98x10 <sup>-5</sup> | $\beta$ : 0.89 (0.45-1.33) | 8.03x10 <sup>-5</sup> |

\*adjusted for age, sex; †adjusted for age, sex, BMI, current smoking, hypertension, dyslipidemia

SUPPLEMENTARY DATA

**Supplementary Table 5.** T2D-affected only analysis. Association between unweighted 13SNP low (n=284), moderate (mod; n=513) and high (n=186) genetic risk score groups and history of prior CVD, all-cause mortality, CVD mortality and CAC in T2D affected European Americans from the Diabetes Heart Study. Effect estimates (odds ratio (OR); hazard ratio (HR);  $\beta$ -coefficient ( $\beta$ )) are reported relative to the low risk group. (compare to Supplementary Table 3).

|                            |                        | Unadjusted                   |         | Partially Adjusted*         |         | Fully Adjusted†             |         |
|----------------------------|------------------------|------------------------------|---------|-----------------------------|---------|-----------------------------|---------|
|                            | n (%) or mean $\pm$ SD | Effect (95% CI)              | p-value | Effect (95% CI)             | p-value | Effect (95% CI)             | p-value |
| <b>Prior CVD</b>           |                        |                              |         |                             |         |                             |         |
| low                        | 111 (39.1%)            | 1.00 (ref)                   | -       | 1.00 (ref)                  | -       | 1.00 (ref)                  | -       |
| mod                        | 219 (42.7%)            | OR: 1.19 (0.89-1.60)         | 0.25    | OR: 1.28 (0.94-1.75)        | 0.12    | OR: 1.34 (0.97-1.85)        | 0.07    |
| high                       | 89 (47.8%)             | OR: 1.46 (1.00-2.12)         | 0.05    | OR: 1.66 (1.12-2.46)        | 0.01    | OR: 1.79 (1.20-2.69)        | 0.005   |
| <b>All-cause Mortality</b> |                        |                              |         |                             |         |                             |         |
| low                        | 69 (24.3%)             | 1.00 (ref)                   | -       | 1.00 (ref)                  | -       | 1.00 (ref)                  | -       |
| mod                        | 118 (23.0%)            | HR: 0.99 (0.72-1.35)         | 0.92    | HR: 1.08 (0.80-1.45)        | 0.61    | HR: 1.11 (0.83-1.49)        | 0.48    |
| high                       | 42 (22.6%)             | HR: 0.93 (0.62-1.38)         | 0.70    | HR: 1.12 (0.76-1.65)        | 0.56    | HR: 1.13 (0.77-1.67)        | 0.53    |
| <b>CVD Mortality</b>       |                        |                              |         |                             |         |                             |         |
| low                        | 28 (9.9%)              | 1.00 (ref)                   | -       | 1.00 (ref)                  | -       | 1.00 (ref)                  | -       |
| mod                        | 55 (10.7%)             | HR: 1.12 (0.69-1.82)         | 0.64    | HR: 1.21 (0.75-1.95)        | 0.43    | HR: 1.25 (0.78-2.01)        | 0.36    |
| high                       | 18 (9.7%)              | HR: 0.97 (0.53-1.79)         | 0.93    | HR: 1.14 (0.62-2.10)        | 0.67    | HR: 1.18 (0.64-2.18)        | 0.59    |
| <b>CAC</b>                 |                        |                              |         |                             |         |                             |         |
| low                        | 2025 $\pm$ 4243        | 1.00 (ref)                   | -       | 1.00 (ref)                  | -       | 1.00 (ref)                  | -       |
| mod                        | 1884 $\pm$ 3086        | $\beta$ : 0.01 (-0.37-0.37)  | 0.98    | $\beta$ : 0.11 (-0.20-0.43) | 0.48    | $\beta$ : 0.15 (-0.16-0.45) | 0.35    |
| high                       | 1697 $\pm$ 2660        | $\beta$ : -0.02 (-0.52-0.49) | 0.95    | $\beta$ : 0.16 (-0.28-0.60) | 0.48    | $\beta$ : 0.20 (-0.23-0.63) | 0.35    |

\*adjusted for age, sex; †adjusted for age, sex, BMI, current smoking, hypertension, dyslipidemia

SUPPLEMENTARY DATA

**Supplementary Table 6.** T2D-affected only analysis. Association between weighted 13SNP low (n=189), moderate (mod; n=602) and high (n=192) genetic risk score groups and history of prior CVD, all-cause mortality, CVD mortality and CAC in T2D affected European Americans from the Diabetes Heart Study. Effect estimates (odds ratio (OR); hazard ratio (HR);  $\beta$ -coefficient ( $\beta$ )) are reported relative to the low risk group. (compare to Table 3).

|                            |                        | Unadjusted                  |         | Partially Adjusted*         |         | Fully Adjusted†             |         |
|----------------------------|------------------------|-----------------------------|---------|-----------------------------|---------|-----------------------------|---------|
|                            | n (%) or mean $\pm$ SD | Effect (95% CI)             | p-value | Effect (95% CI)             | p-value | Effect (95% CI)             | p-value |
| <b>Prior CVD</b>           |                        |                             |         |                             |         |                             |         |
| low                        | 67 (35.4%)             | 1.00 (ref)                  | -       | 1.00 (ref)                  | -       | 1.00 (ref)                  | -       |
| mod                        | 255 (42.4%)            | OR: 1.39 (0.97-1.99)        | 0.07    | OR: 1.36 (0.93-1.98)        | 0.11    | OR: 1.41 (0.95-2.08)        | 0.09    |
| high                       | 97 (50.5%)             | OR: 1.93 (1.25-2.96)        | 0.003   | OR: 2.17 (1.40-3.38)        | 0.0006  | OR: 2.40 (1.52-3.79)        | 0.0002  |
| <b>All-cause Mortality</b> |                        |                             |         |                             |         |                             |         |
| low                        | 34 (17.9%)             | 1.00 (ref)                  | -       | 1.00 (ref)                  | -       | 1.00 (ref)                  | -       |
| mod                        | 155 (25.7%)            | HR: 1.60 (1.09-2.33)        | 0.02    | HR: 1.61 (1.11-2.32)        | 0.01    | HR: 1.62 (1.12-2.33)        | 0.01    |
| high                       | 40 (20.8%)             | HR: 1.16 (0.72-1.87)        | 0.55    | HR: 1.32 (0.83-2.11)        | 0.25    | HR: 1.34 (0.84-2.15)        | 0.22    |
| <b>CVD Mortality</b>       |                        |                             |         |                             |         |                             |         |
| low                        | 11 (5.8%)              | 1.00 (ref)                  | -       | 1.00 (ref)                  | -       | 1.00 (ref)                  | -       |
| mod                        | 70 (11.6%)             | HR: 2.20 (1.19-4.08)        | 0.01    | HR: 2.18 (1.18-4.01)        | 0.01    | HR: 2.20 (1.19-4.10)        | 0.01    |
| high                       | 20 (10.4%)             | HR: 1.77 (0.84-3.72)        | 0.13    | HR: 1.96 (0.93-4.15)        | 0.08    | HR: 2.02 (0.94-4.34)        | 0.07    |
| <b>CAC</b>                 |                        |                             |         |                             |         |                             |         |
| low                        | 1604 $\pm$ 2909        | 1.00 (ref)                  | -       | 1.00 (ref)                  | -       | 1.00 (ref)                  | -       |
| mod                        | 1946 $\pm$ 3069        | $\beta$ : 0.36 (-0.04-0.75) | 0.08    | $\beta$ : 0.30 (-0.03-0.63) | 0.07    | $\beta$ : 0.32 (-0.01-0.64) | 0.06    |
| high                       | 1707 $\pm$ 2685        | $\beta$ : 0.24 (-0.28-0.76) | 0.37    | $\beta$ : 0.35 (-0.10-0.80) | 0.13    | $\beta$ : 0.44 (0.01-0.87)  | 0.05    |

\*adjusted for age, sex; †adjusted for age, sex, BMI, current smoking, hypertension, dyslipidemia

SUPPLEMENTARY DATA

**Supplementary Table 7.** T2D-affected only analysis. Association between unweighted 30SNP low (n=161), moderate (mod; n=684) and high (n=138) genetic risk score groups and history of prior CVD, all-cause mortality, CVD mortality and CAC in T2D-affected European Americans from the Diabetes Heart Study. Effect estimates (odds ratio (OR); hazard ratio (HR);  $\beta$ -coefficient ( $\beta$ )) are reported relative to the low risk group. (compare to Supplementary Table 4).

|                            |                        | Unadjusted                  |         | Partially Adjusted*        |                       | Fully Adjusted†            |                       |
|----------------------------|------------------------|-----------------------------|---------|----------------------------|-----------------------|----------------------------|-----------------------|
|                            | n (%) or mean $\pm$ SD | Effect (95% CI)             | p-value | Effect (95% CI)            | p-value               | Effect (95% CI)            | p-value               |
| <b>Prior CVD</b>           |                        |                             |         |                            |                       |                            |                       |
| low                        | 59 (36.4%)             | 1.00 (ref)                  | -       | 1.00 (ref)                 | -                     | 1.00 (ref)                 | -                     |
| mod                        | 292 (42.7%)            | OR: 1.31 (0.92-1.88)        | 0.14    | OR: 1.39 (0.96-2.00)       | 0.08                  | OR: 1.45 (0.99-2.12)       | 0.06                  |
| high                       | 68 (49.3%)             | OR: 1.72 (1.05-2.79)        | 0.03    | OR: 1.90 (1.16-3.11)       | 0.01                  | OR: 2.05 (1.23-3.44)       | 0.006                 |
| <b>All-cause Mortality</b> |                        |                             |         |                            |                       |                            |                       |
| low                        | 27 (16.7%)             | 1.00 (ref)                  | -       | 1.00 (ref)                 | -                     | 1.00 (ref)                 | -                     |
| mod                        | 167 (24.4%)            | HR: 1.56 (1.05-2.33)        | 0.03    | HR: 1.64 (1.13-2.39)       | 0.01                  | OR: 1.65 (1.13-2.40)       | 0.009                 |
| high                       | 35 (25.4%)             | HR: 1.54 (0.91-2.60)        | 0.11    | HR: 1.70 (1.04-2.81)       | 0.04                  | OR: 1.66 (1.00-2.75)       | 0.05                  |
| <b>CVD Mortality</b>       |                        |                             |         |                            |                       |                            |                       |
| low                        | 10 (6.2%)              | 1.00 (ref)                  | -       | 1.00 (ref)                 | -                     | 1.00 (ref)                 | -                     |
| mod                        | 71 (10.4%)             | HR: 1.79 (0.87-3.67)        | 0.11    | HR: 1.87 (0.92-3.81)       | 0.08                  | HR: 1.96 (0.96-4.00)       | 0.06                  |
| high                       | 20 (14.5%)             | HR: 2.35 (1.04-5.30)        | 0.04    | HR: 2.56 (1.14-5.75)       | 0.02                  | HR: 2.71 (1.18-6.21)       | 0.02                  |
| <b>CAC</b>                 |                        |                             |         |                            |                       |                            |                       |
| low                        | 1556 $\pm$ 2880        | 1.00 (ref)                  | -       | 1.00 (ref)                 | -                     | 1.00 (ref)                 | -                     |
| mod                        | 1933 $\pm$ 3537        | $\beta$ : 0.41 (-0.03-0.84) | 0.07    | $\beta$ : 0.47 (0.12-0.82) | 0.009                 | $\beta$ : 0.47 (0.13-0.81) | 0.007                 |
| high                       | 2048 $\pm$ 3129        | $\beta$ : 0.97 (0.28-0.42)  | 0.0006  | $\beta$ : 1.06 (0.60-1.53) | 7.29x10 <sup>-6</sup> | $\beta$ : 1.06 (0.60-1.51) | 5.22x10 <sup>-6</sup> |

\*adjusted for age, sex; †adjusted for age, sex, BMI, current smoking, hypertension, dyslipidemia

SUPPLEMENTARY DATA

**Supplementary Table 8.** T2D-affected only analysis. Association between weighted 30SNP low (n=159), moderate (mod; n=591) and high (n=233) genetic risk score groups and history of prior CVD, all-cause mortality, CVD mortality and CAC in T2D-affected European Americans from the Diabetes Heart Study. Effect estimates (odds ratio (OR); hazard ratio (HR);  $\beta$ -coefficient ( $\beta$ )) are reported relative to the low risk group. (compare to Table 4).

|                            |                        | Unadjusted                  |         | Partially Adjusted*        |         | Fully Adjusted†            |         |
|----------------------------|------------------------|-----------------------------|---------|----------------------------|---------|----------------------------|---------|
|                            | n (%) or mean $\pm$ SD | Effect (95% CI)             | p-value | Effect (95% CI)            | p-value | Effect (95% CI)            | p-value |
| <b>Prior CVD</b>           |                        |                             |         |                            |         |                            |         |
| low                        | 60 (37.7%)             | 1.00 (ref)                  | -       | 1.00 (ref)                 | -       | 1.00 (ref)                 | -       |
| mod                        | 250 (42.3%)            | OR: 1.23 (0.82-1.84)        | 0.26    | OR: 1.32 (0.86-2.02)       | 0.15    | OR: 1.37 (0.93-2.03)       | 0.11    |
| high                       | 109 (46.8%)            | OR: 1.47 (0.96-2.25)        | 0.07    | OR: 1.66 (1.06-2.59)       | 0.03    | OR: 1.82 (1.14-2.89)       | 0.01    |
| <b>All-cause Mortality</b> |                        |                             |         |                            |         |                            |         |
| low                        | 29 (18.2%)             | 1.00 (ref)                  | -       | 1.00 (ref)                 | -       | 1.00 (ref)                 | -       |
| mod                        | 140 (23.7%)            | HR: 1.44 (0.95-2.17)        | 0.09    | HR: 1.63 (1.11-2.40)       | 0.01    | OR: 1.64 (1.12-2.40)       | 0.01    |
| high                       | 60 (25.8%)             | HR: 1.46 (0.91-2.34)        | 0.12    | HR: 1.72 (1.09-2.72)       | 0.02    | OR: 1.75 (1.01-2.74)       | 0.02    |
| <b>CVD Mortality</b>       |                        |                             |         |                            |         |                            |         |
| low                        | 12 (7.5%)              | 1.00 (ref)                  | -       | 1.00 (ref)                 | -       | 1.00 (ref)                 | -       |
| mod                        | 58 (9.8%)              | HR: 1.43 (0.75-2.73)        | 0.28    | HR: 1.59 (0.84-3.01)       | 0.15    | HR: 1.67 (0.88-3.17)       | 0.12    |
| high                       | 31 (13.3%)             | HR: 1.81 (0.90-3.64)        | 0.10    | HR: 2.08 (1.03-4.19)       | 0.04    | HR: 2.21 (1.09-4.48)       | 0.03    |
| <b>CAC</b>                 |                        |                             |         |                            |         |                            |         |
| low                        | 1665 $\pm$ 3292        | 1.00 (ref)                  | -       | 1.00 (ref)                 | -       | 1.00 (ref)                 | -       |
| mod                        | 1954 $\pm$ 3583        | $\beta$ : 0.42 (-0.02-0.86) | 0.06    | $\beta$ : 0.53 (0.15-0.92) | 0.007   | $\beta$ : 0.57 (0.20-0.94) | 0.003   |
| high                       | 1871 $\pm$ 2894        | $\beta$ : 0.50 (-0.03-1.03) | 0.07    | $\beta$ : 0.66 (0.20-1.12) | 0.005   | $\beta$ : 0.69 (0.25-1.13) | 0.002   |

\*adjusted for age, sex; †adjusted for age, sex, BMI, current smoking, hypertension, dyslipidemia

SUPPLEMENTARY DATA

**Supplementary Table 9.** Changes in risk classification as assessed using a net reclassification index (NRI) comparing fully adjusted models and fully adjusted models with the addition of genetic risk groups.

| <b>Trait</b>                 | <b>% reclassified</b> | <b>NRI</b> | <b>p-value</b> |
|------------------------------|-----------------------|------------|----------------|
| <b>13 SNP Unweighted GRS</b> |                       |            |                |
| Prior CVD                    | 10.6%                 | 0.041      | 0.04           |
| All-cause Mortality          | 3.9%                  | 0.020      | 0.12           |
| CVD Mortality                | 13.3%                 | 0.010      | 0.77           |
| <b>13 SNP Weighted GRS</b>   |                       |            |                |
| Prior CVD                    | 12.1%                 | 0.031      | 0.13           |
| All-cause Mortality          | 6.8%                  | 0.040      | 0.03           |
| CVD Mortality                | 13.3%                 | 0.062      | 0.06           |
| <b>30 SNP Unweighted GRS</b> |                       |            |                |
| Prior CVD                    | 10.0%                 | 0.005      | 0.78           |
| All-cause Mortality          | 9.4%                  | 0.014      | 0.48           |
| CVD Mortality                | 20.2%                 | 0.065      | 0.17           |
| <b>30 SNP Weighted GRS</b>   |                       |            |                |
| Prior CVD                    | 9.1%                  | 0.002      | 0.93           |
| All-cause Mortality          | 11.8%                 | 0.055      | 0.02           |
| CVD Mortality                | 16.0%                 | 0.060      | 0.09           |
